# Supplementary material
Source: PubMed Central journal article supplement (PMC7199794)
Supplement: NIHMS1583723-supplement-Supplement_figures.pdf [file NIHMS1583723-supplement-Supplement_figures.pdf]

Figure S1

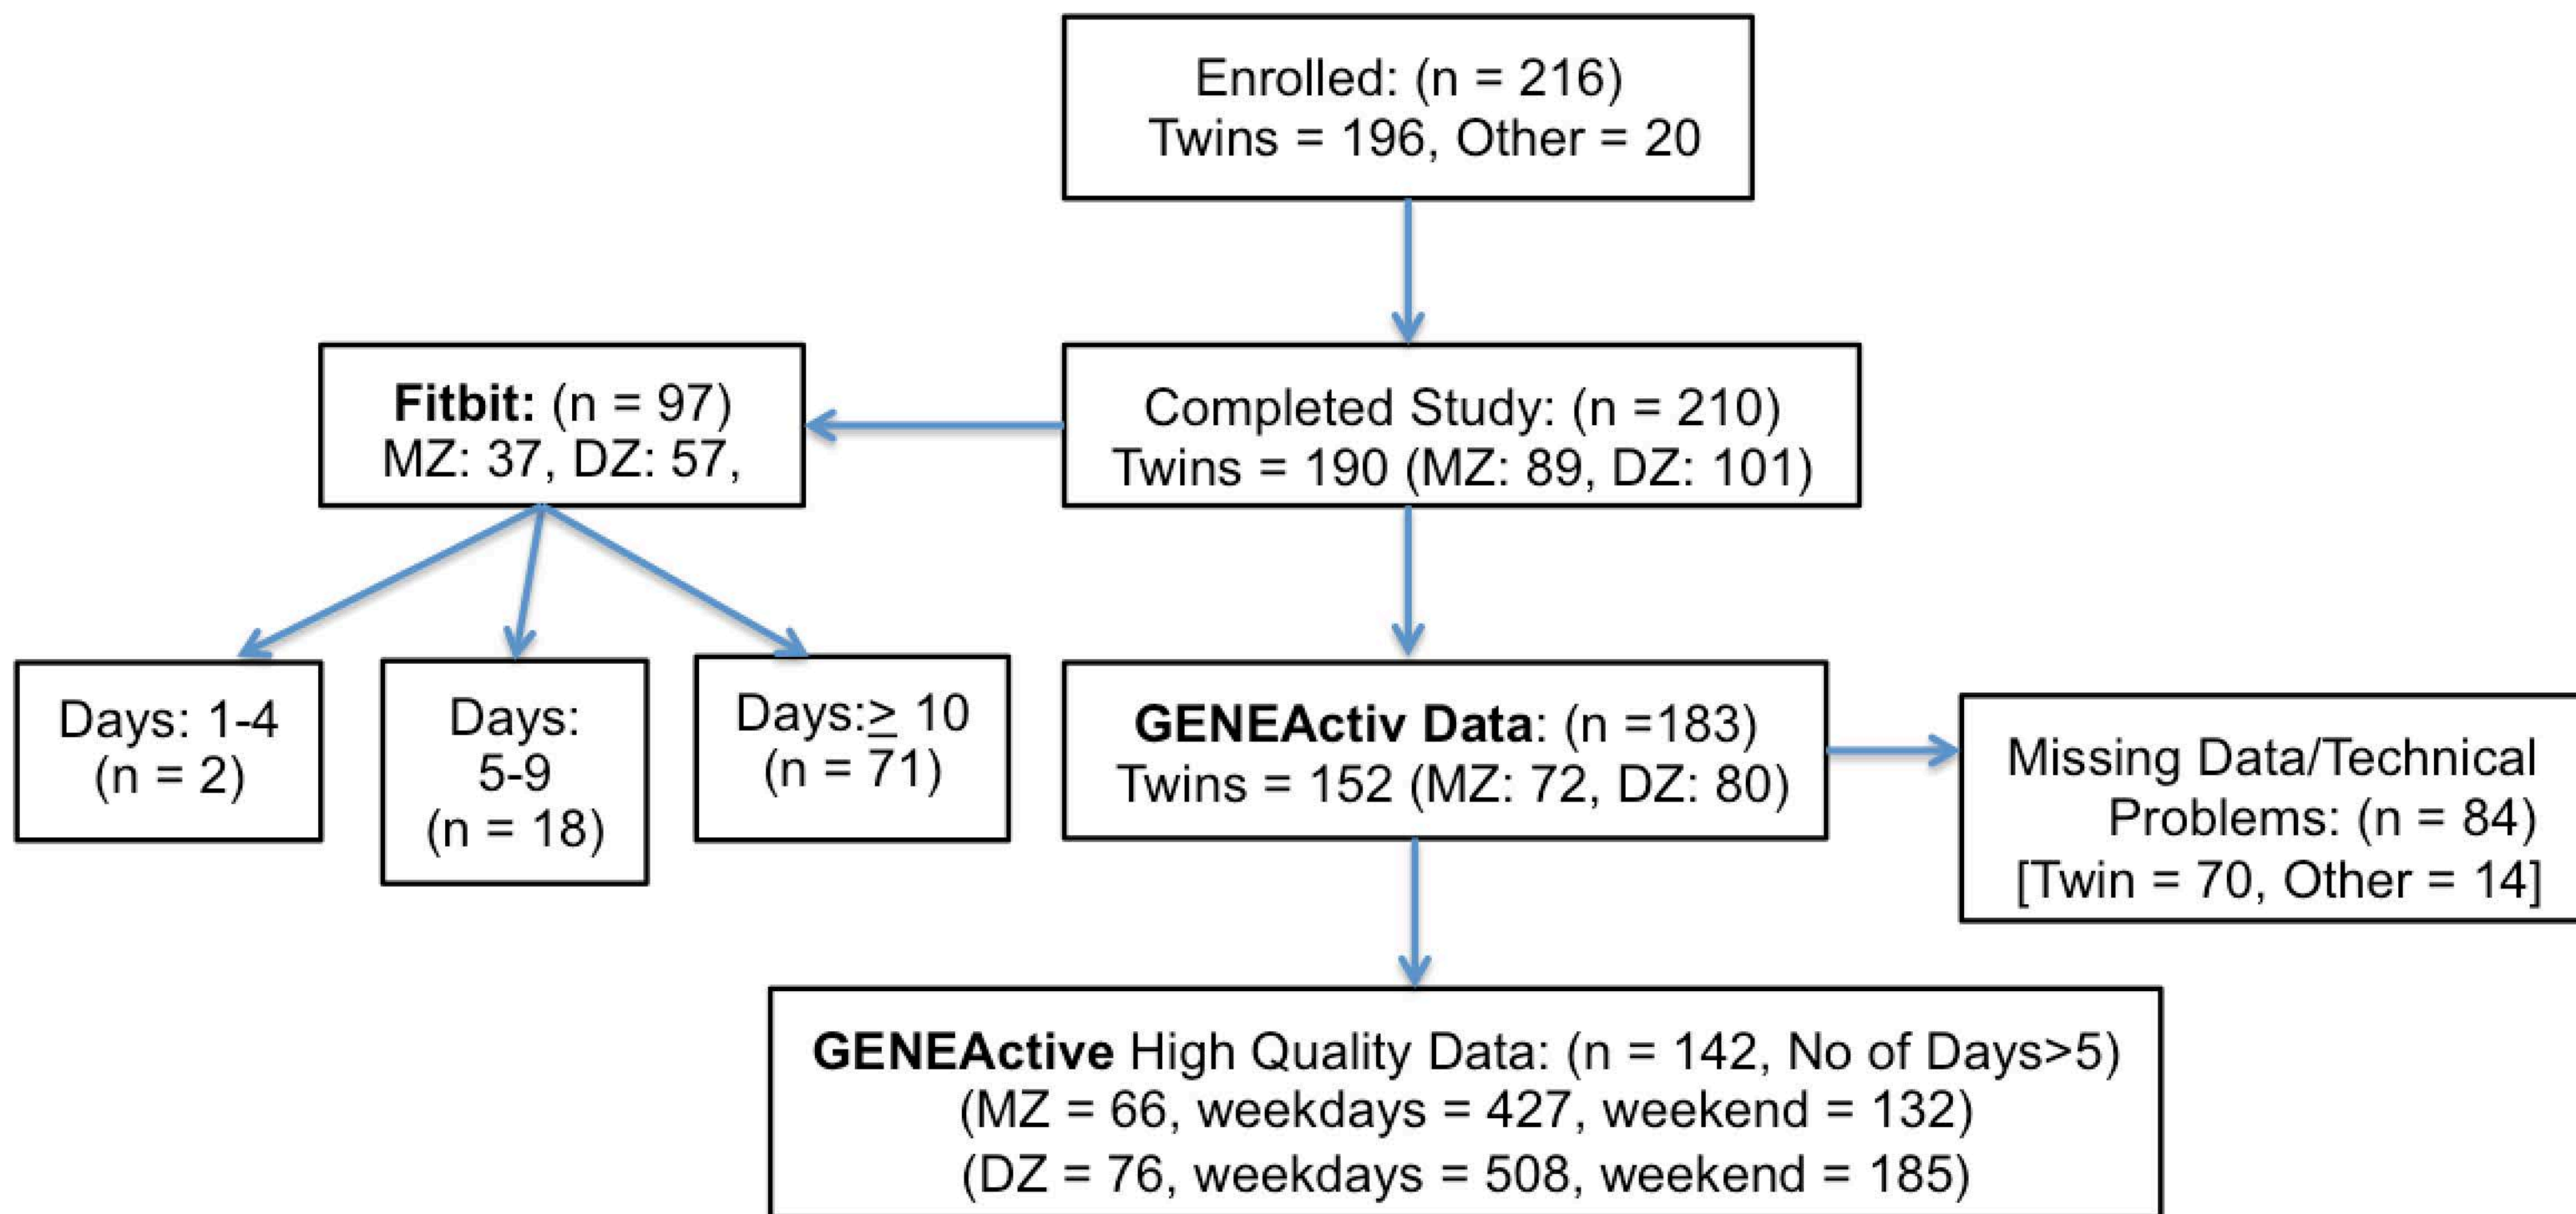

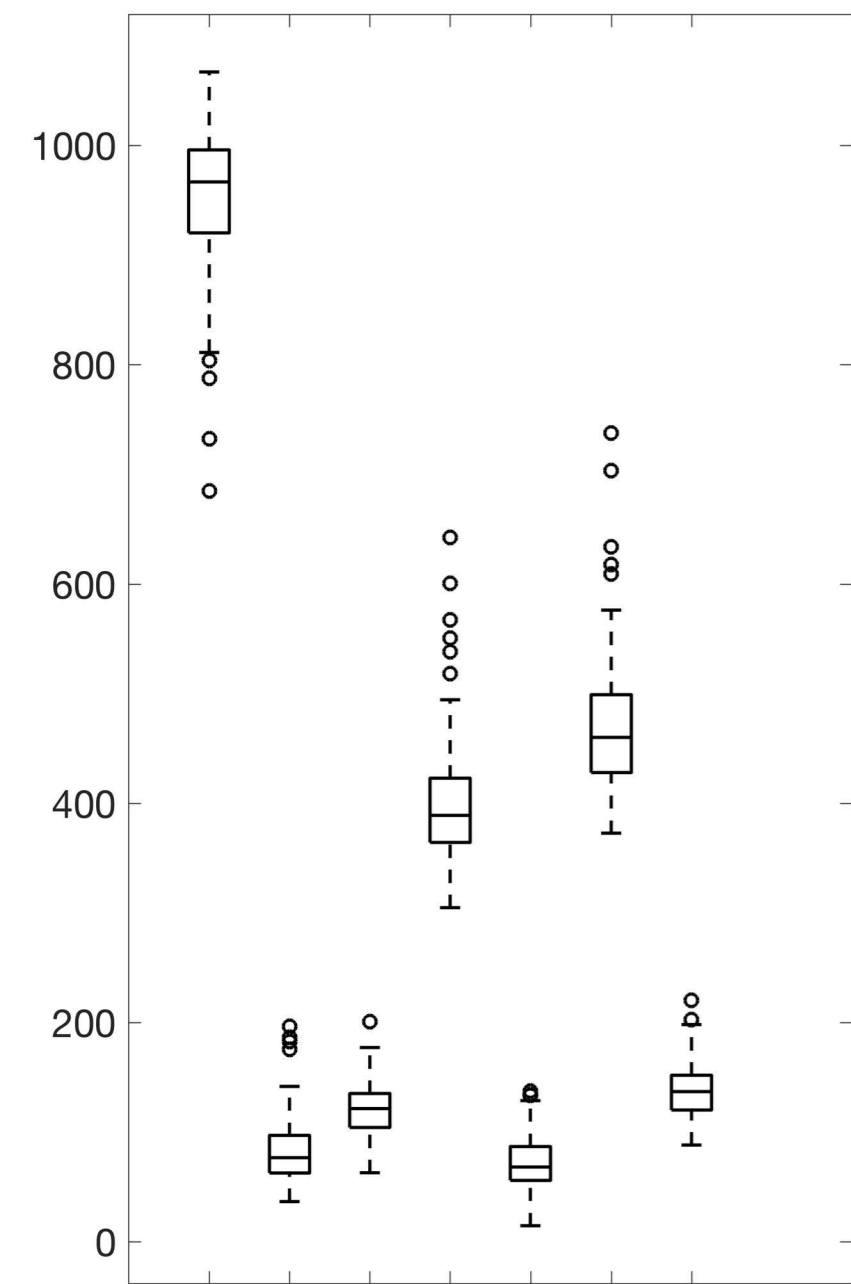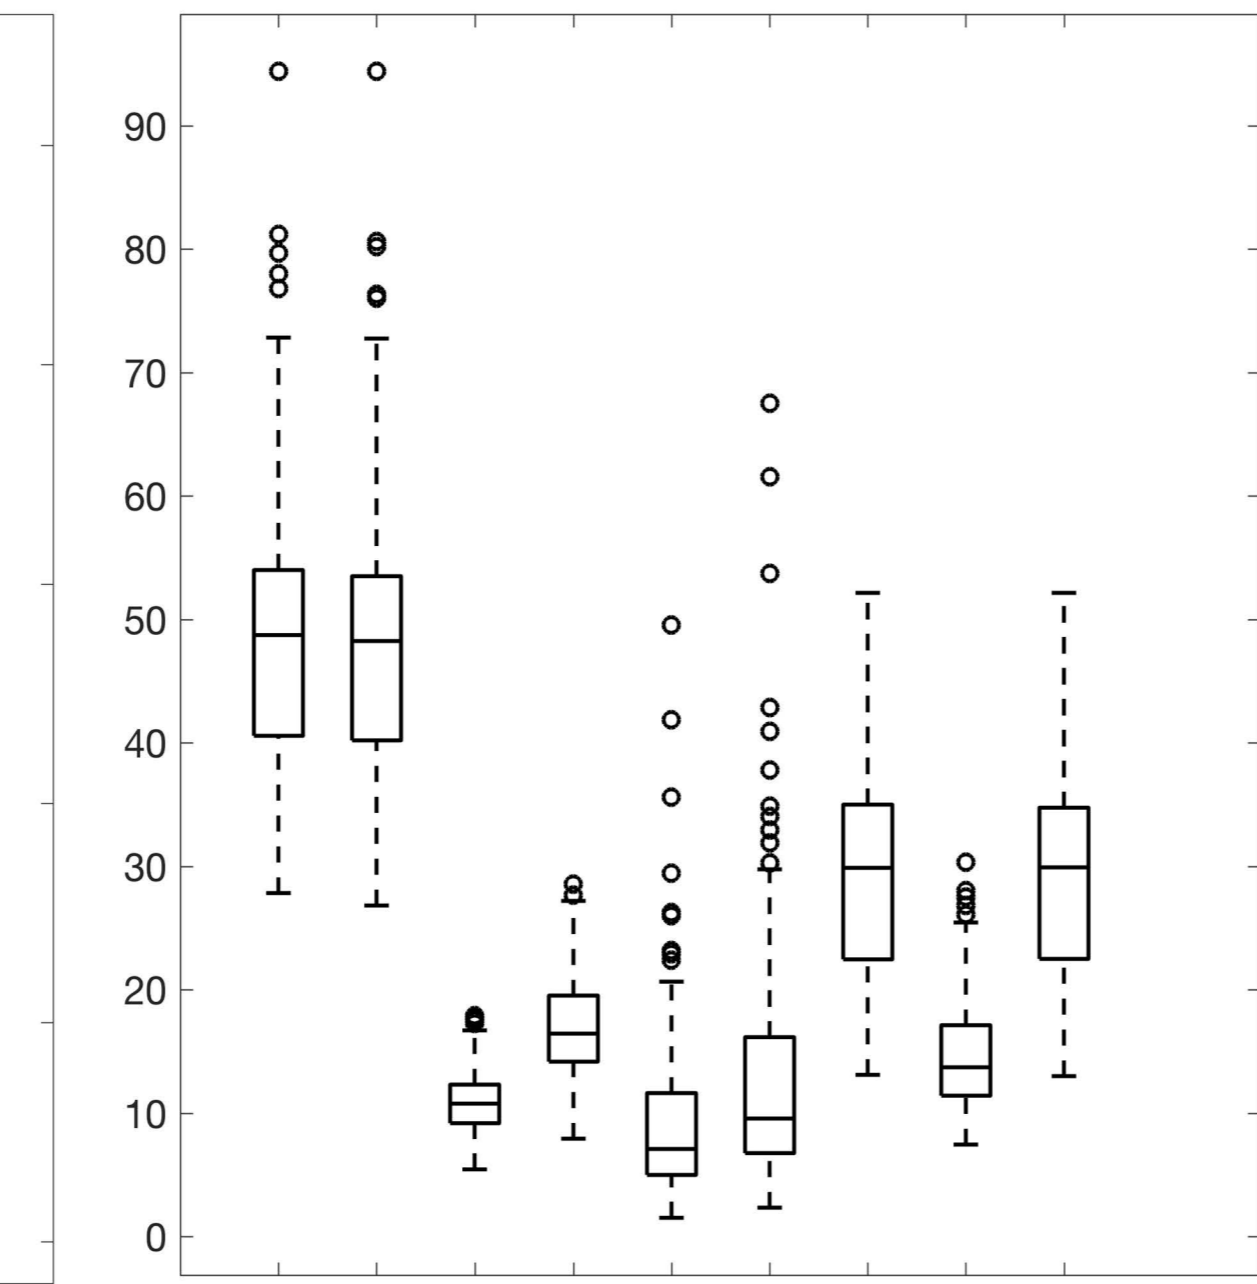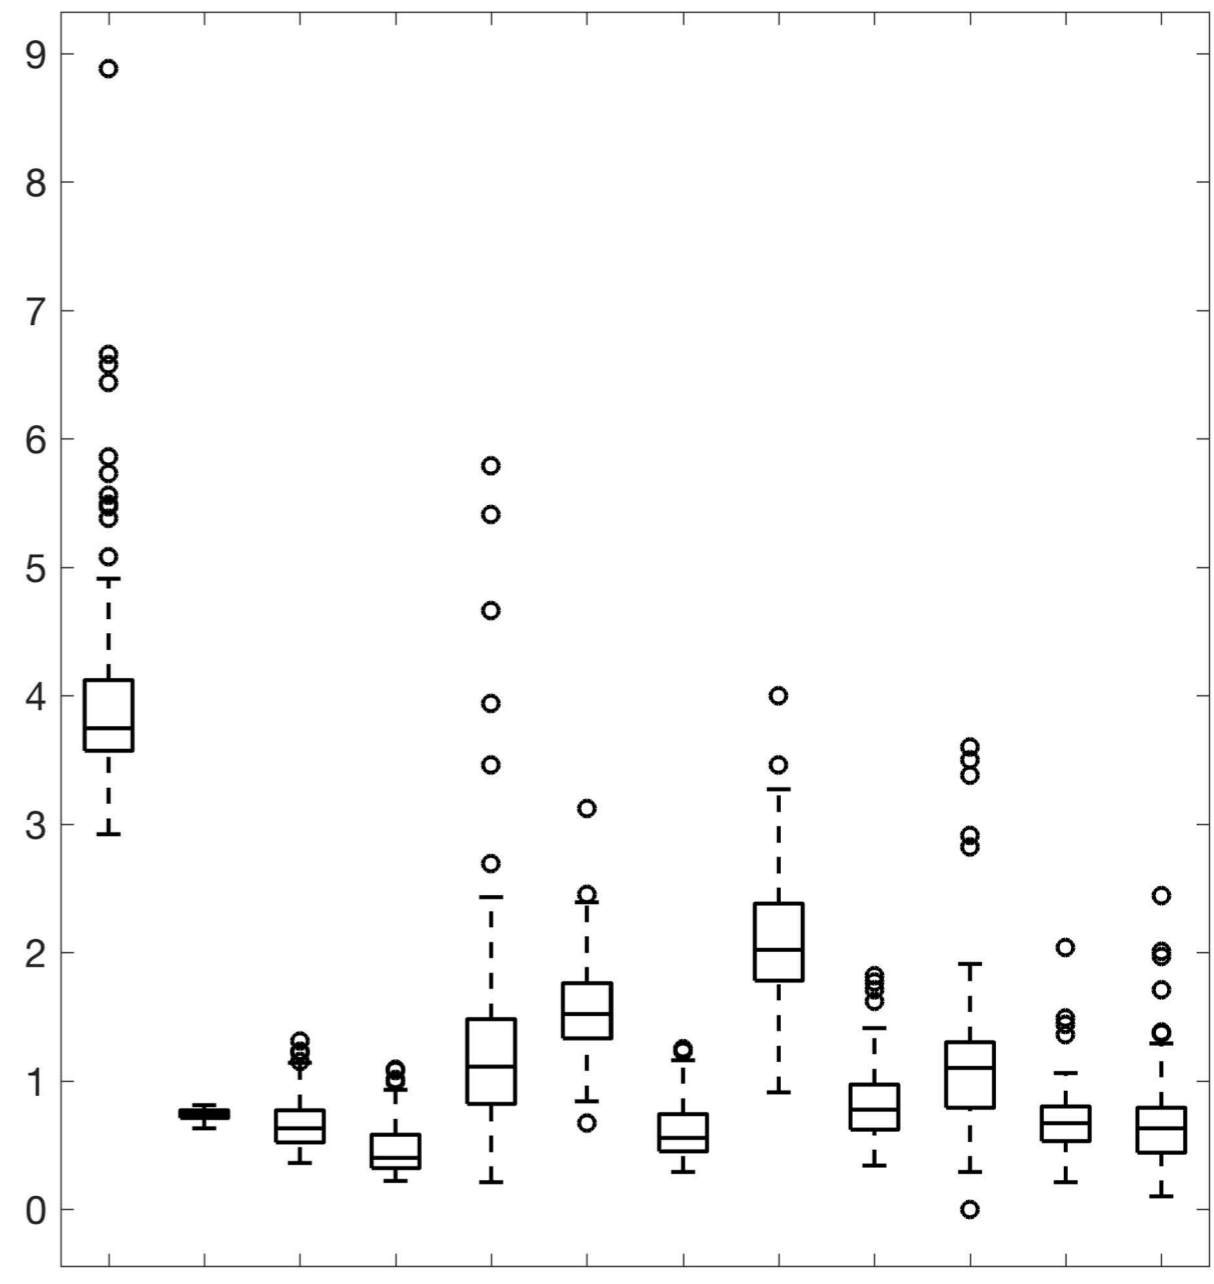

Active Wake  
 Quiet wake  
 Intermediate Sleep  
 Light Sleep  
 Deep Sleep  
 Total Sleep  
 Wake After Sleep Onset

No of Sleep Episodes  
 No of wake Episodes  
 Mean duration of sleep episodes  
 Mean duration of wake episodes  
 Variance activity in assessed time  
 Variance of activity during wake  
 Number of sleep episodes during sleep session  
 Mean duration of sleep episodes during sleep session  
 Number of wake episodes during sleep session

Mean activity during sleep session  
 Sleep efficiency  
 Mean activity during main rest episode  
 Median Activity During rest Episodes  
 Mean variance of activity during rest episode  
 Mean activity in assessed time  
 Median activity in assessed time  
 Mean activity during wake  
 Median activity during wake  
 Total time in homothermic state during sleep  
 Total time in homothermic state during wake



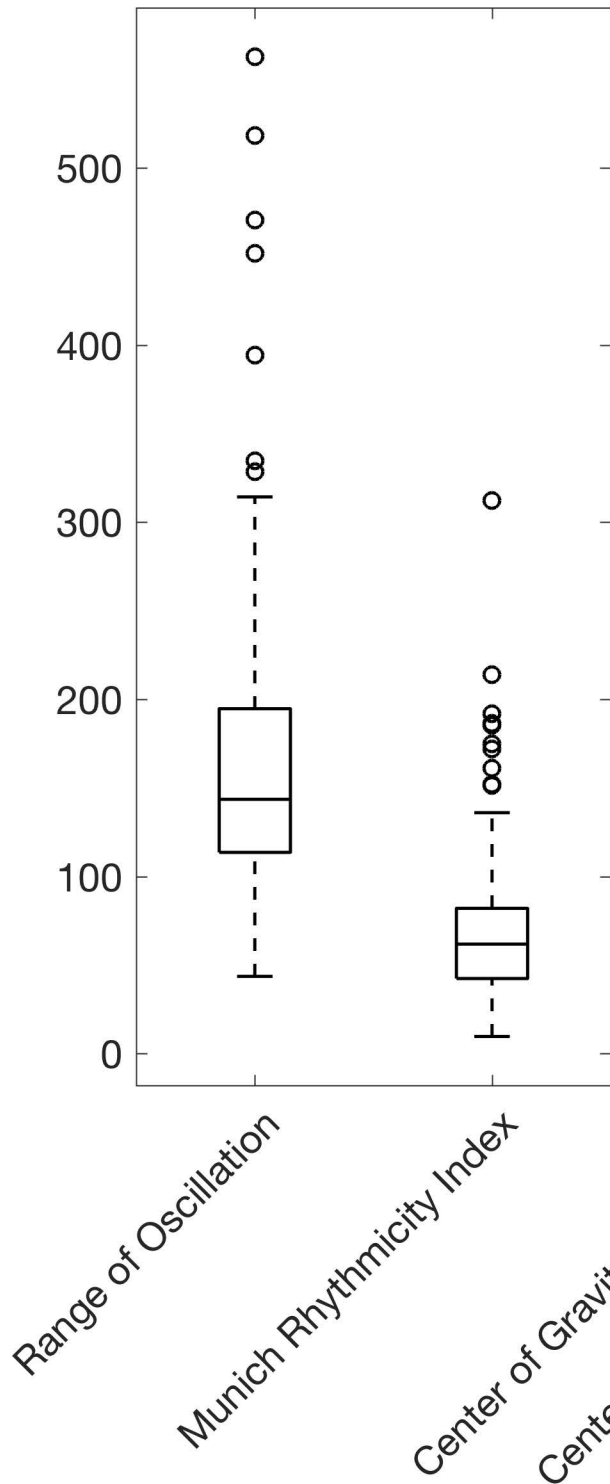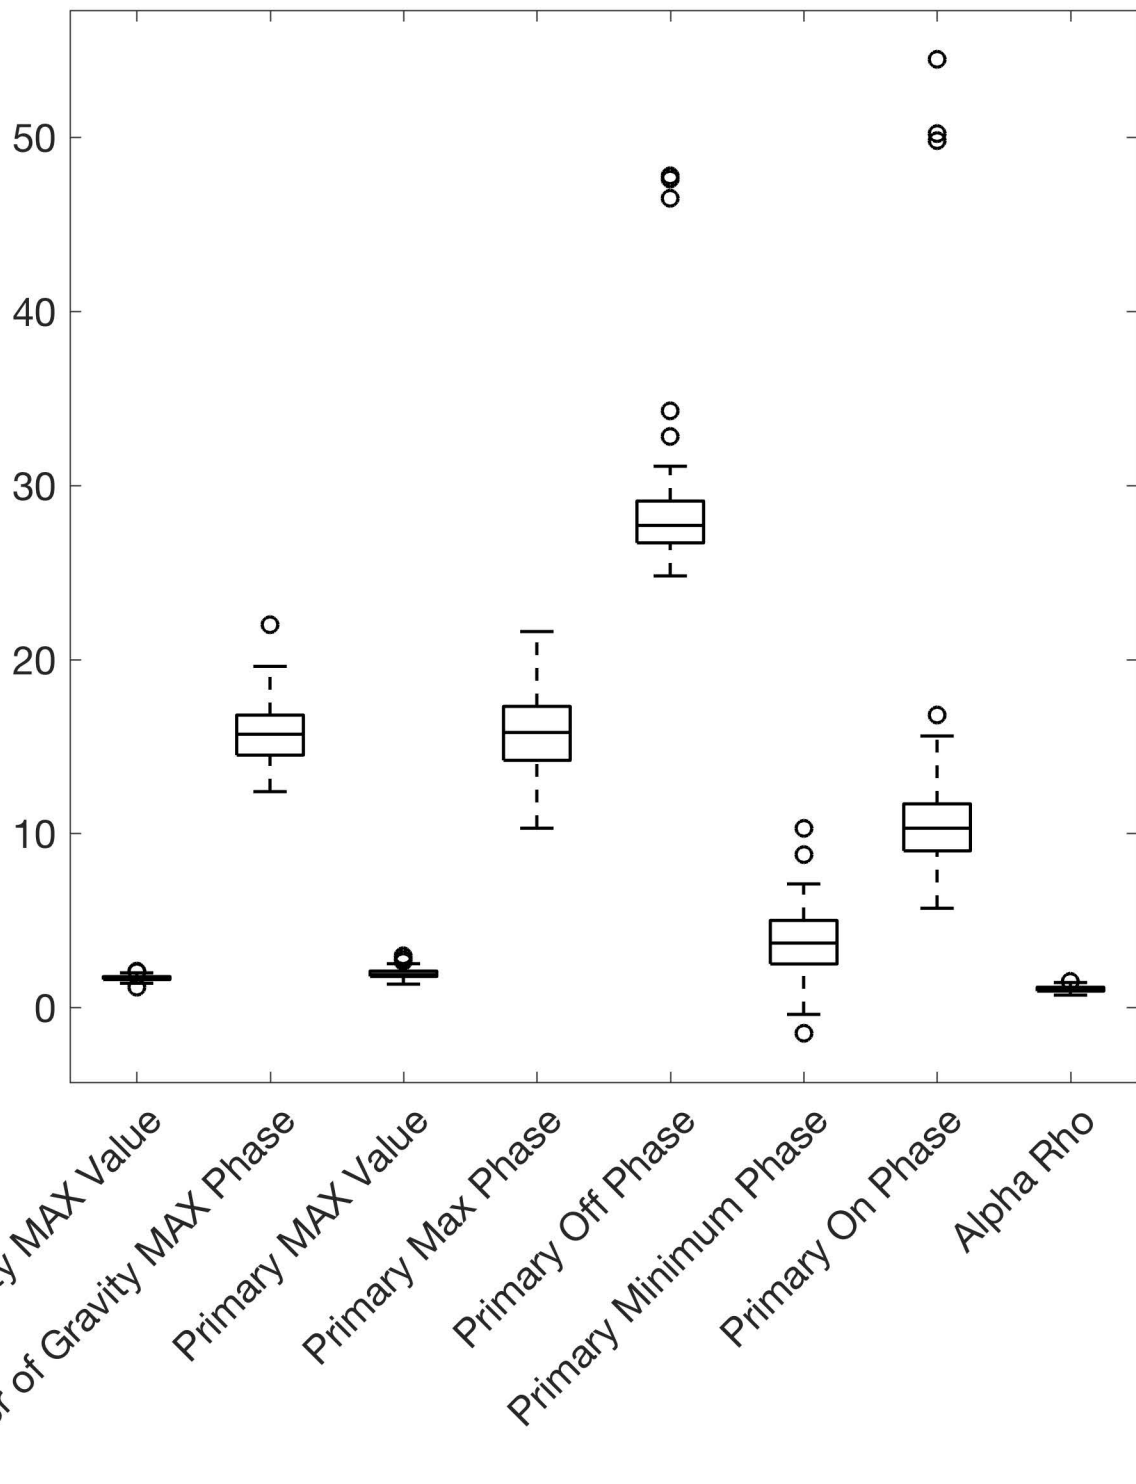

Figure S3B:  
 Intercorrelations among  
 ChronoSapiens parameters

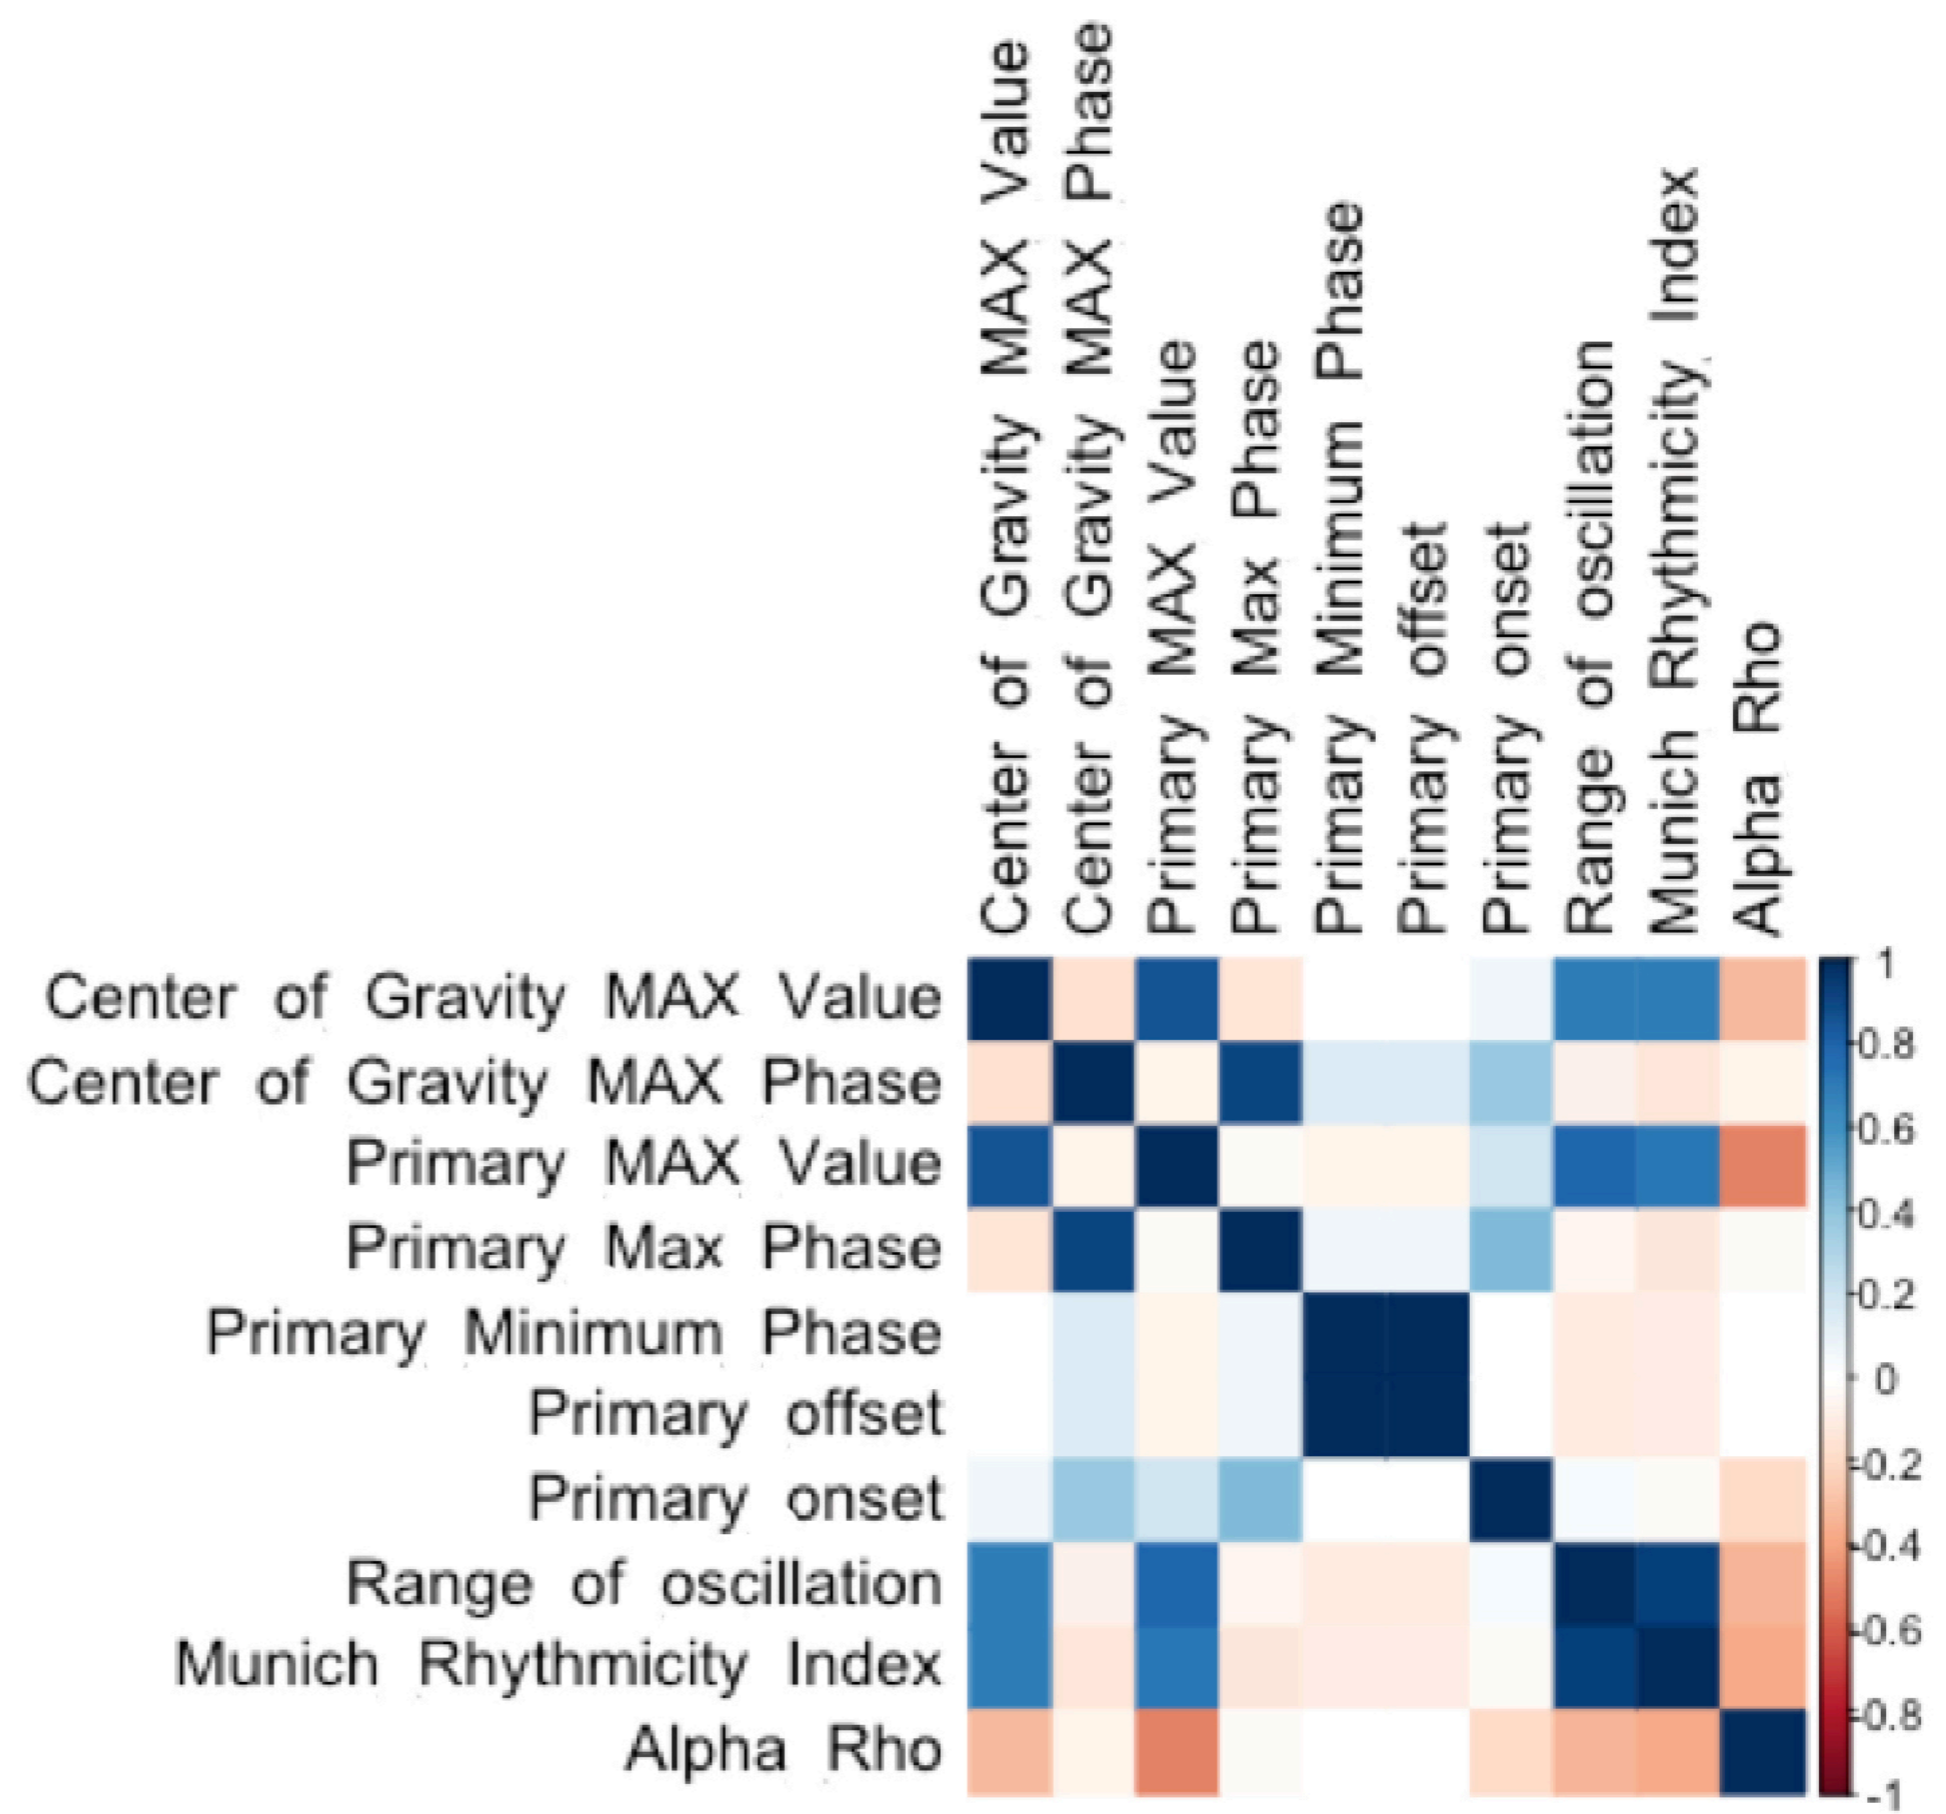

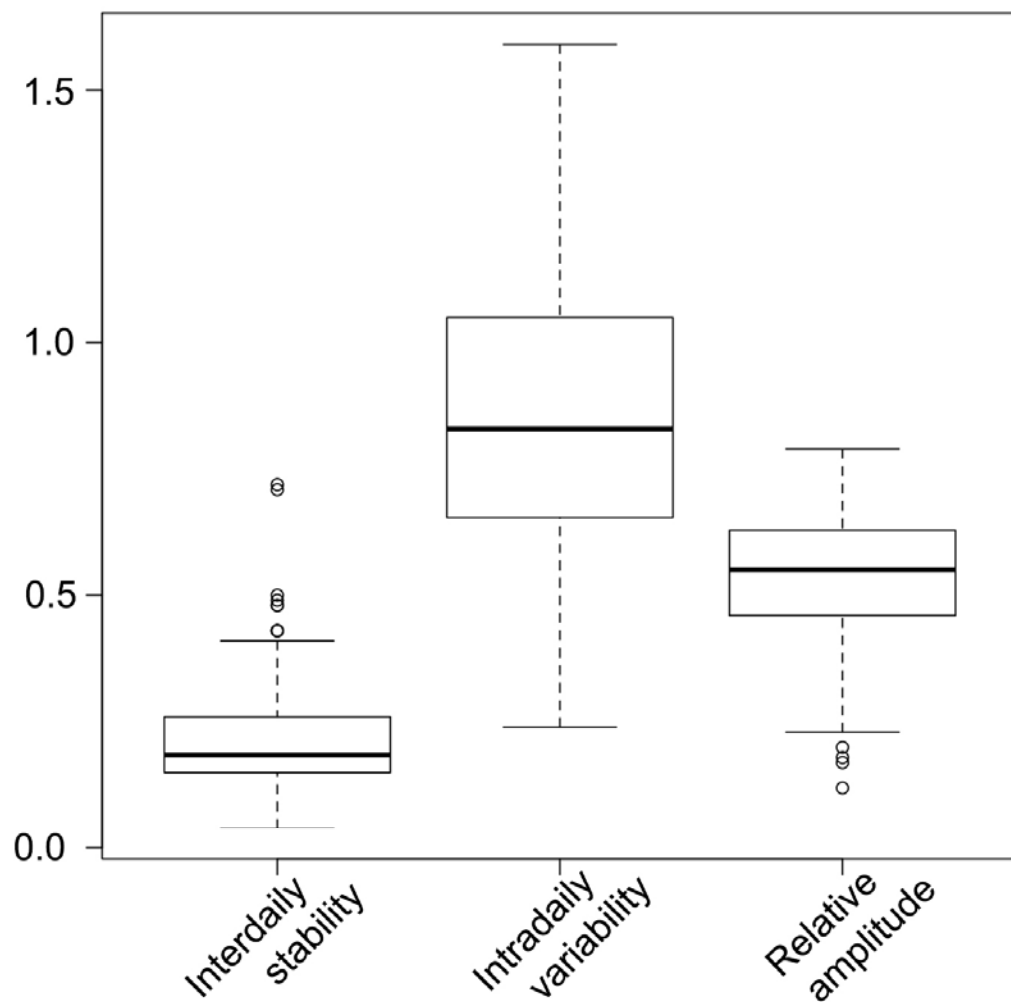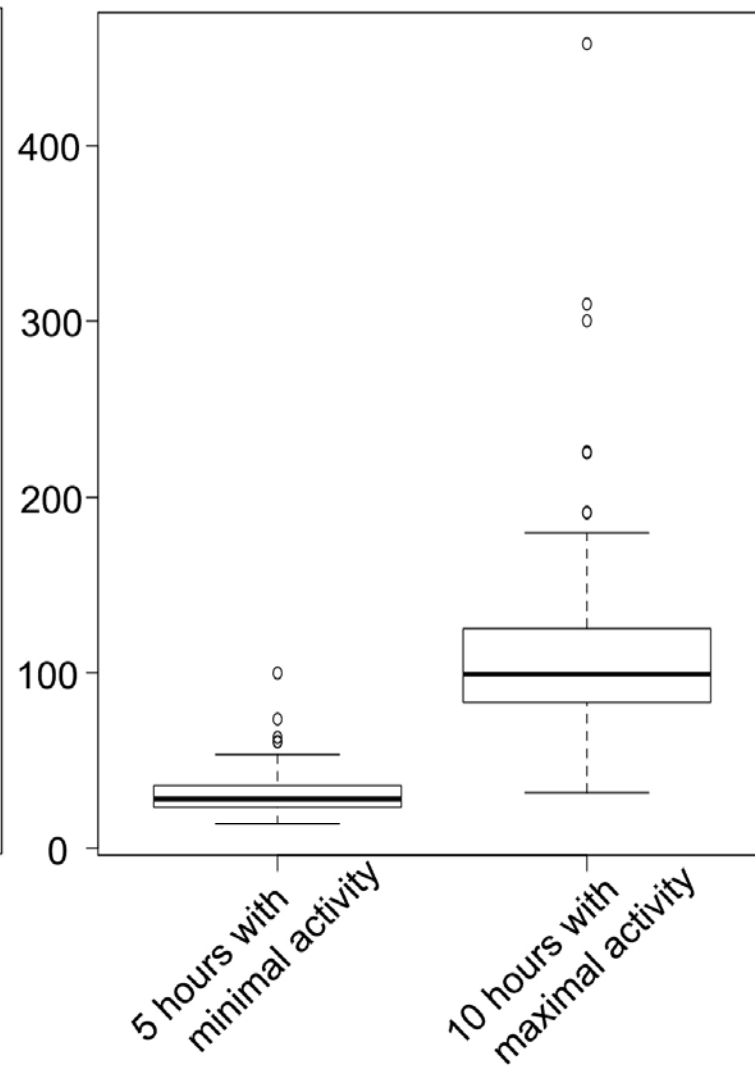

Probability density

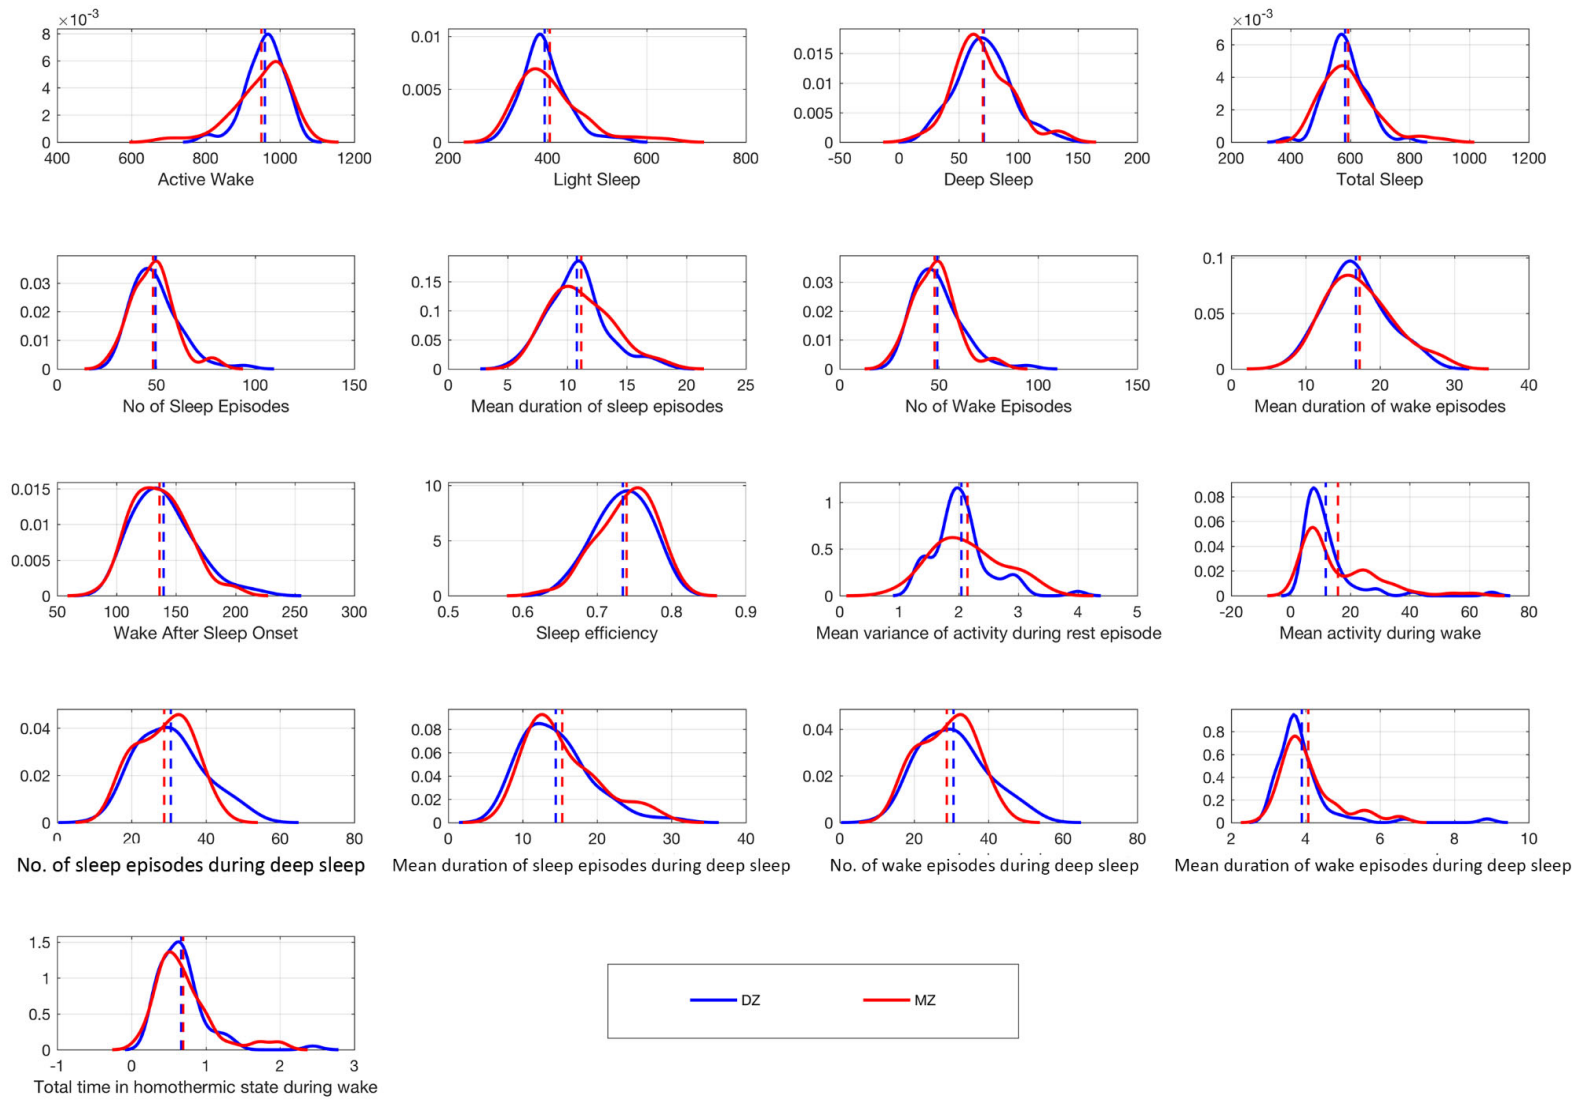

Figure S5A

Probability density

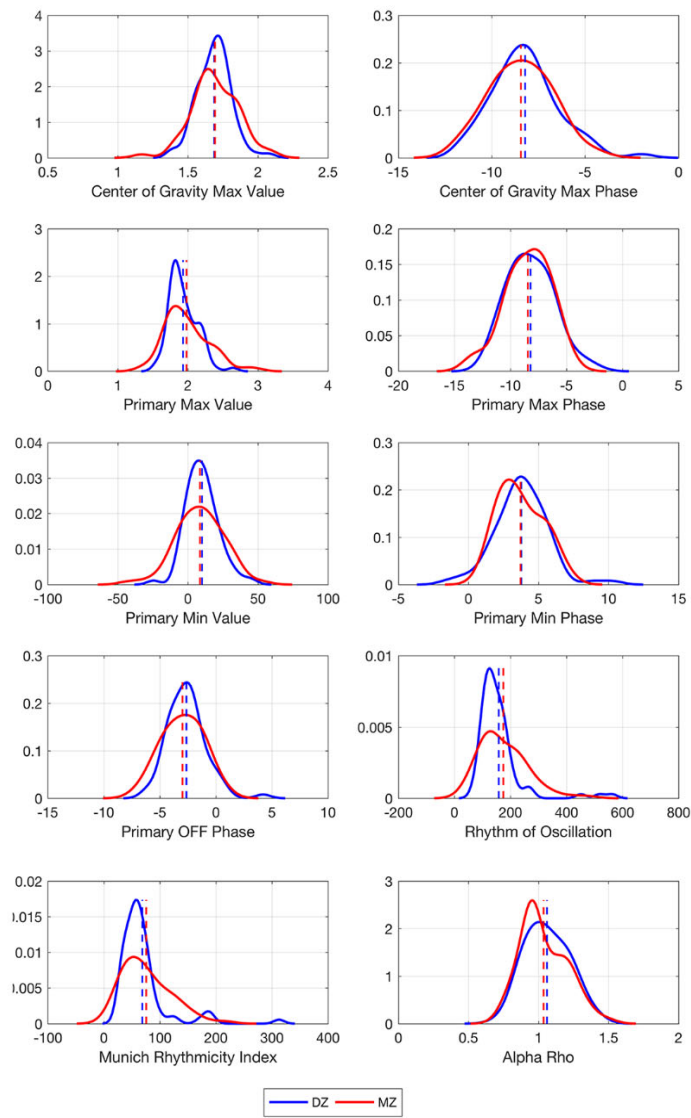

Figure S5B



Probability density

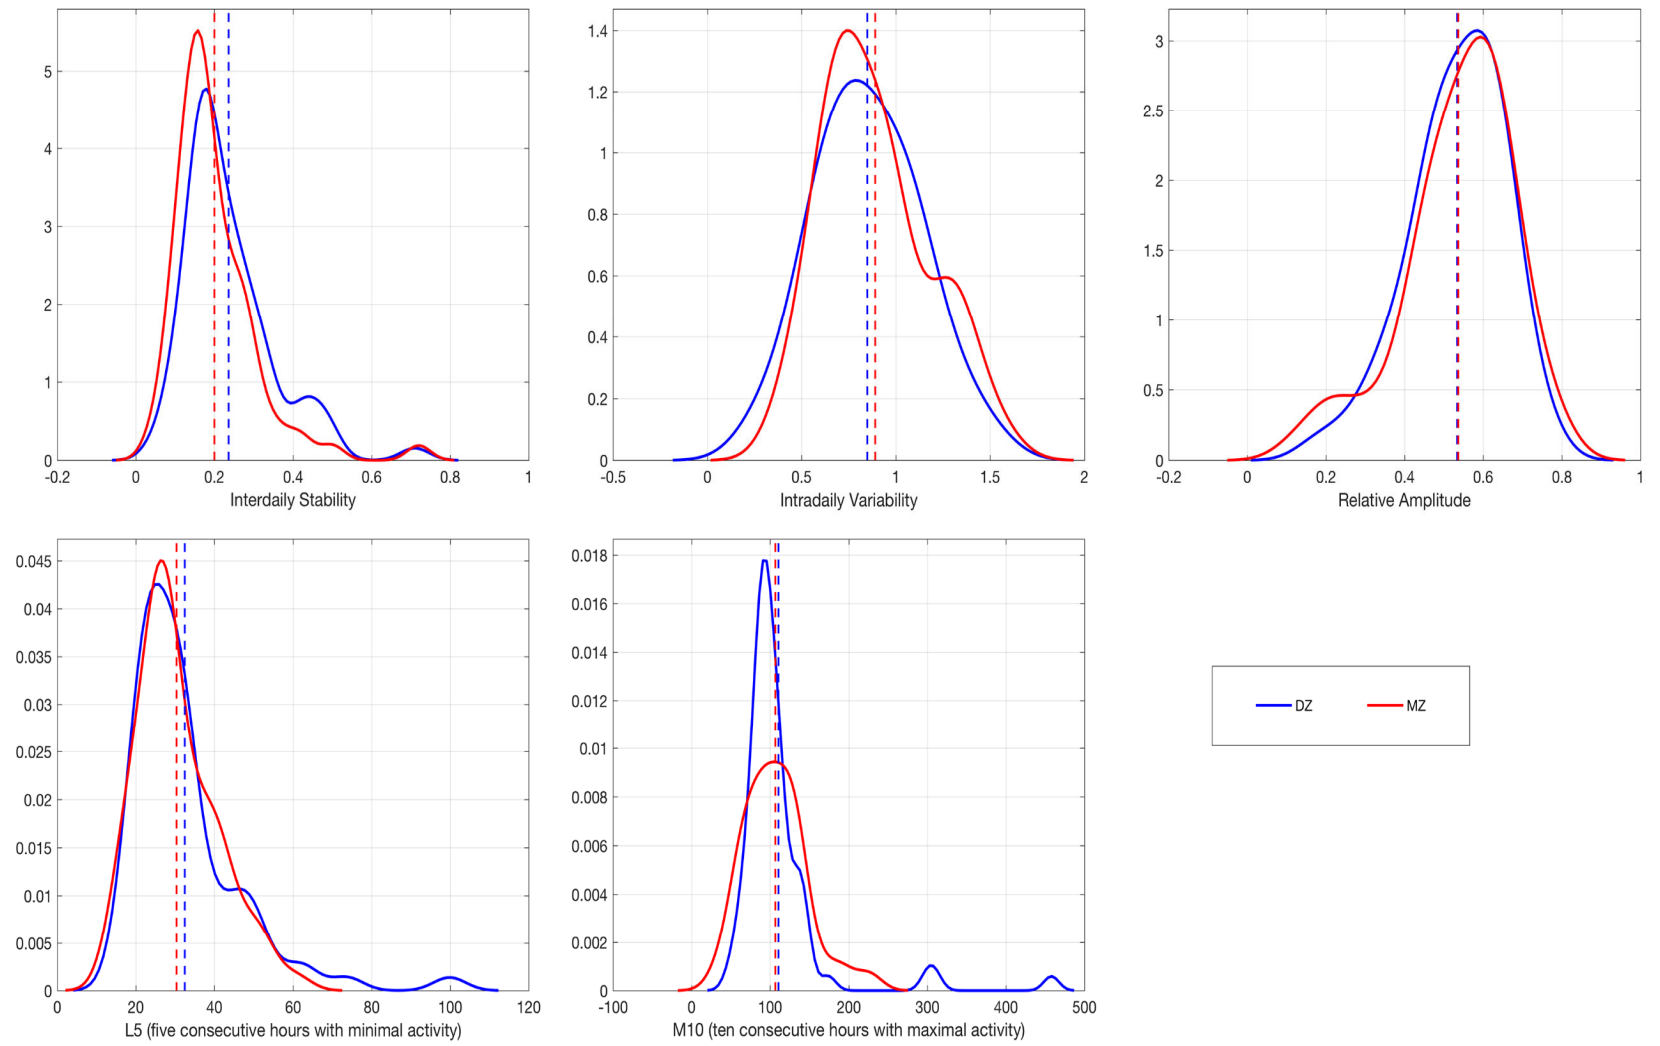

Figure S5C

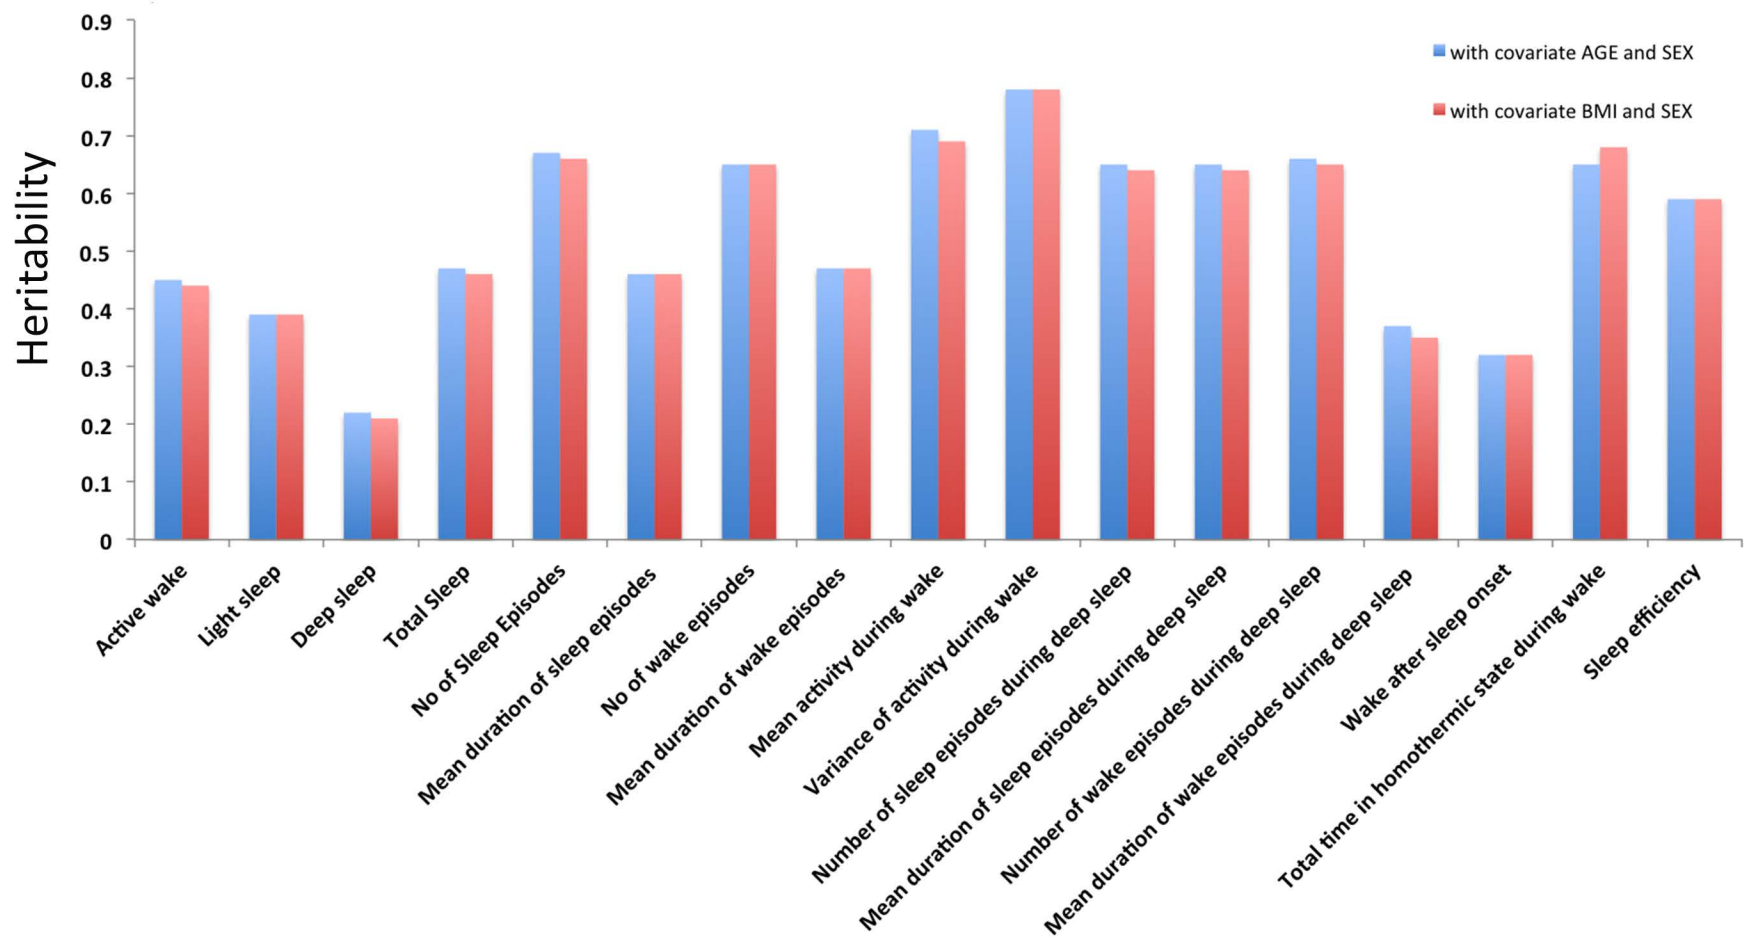

Figure S6.

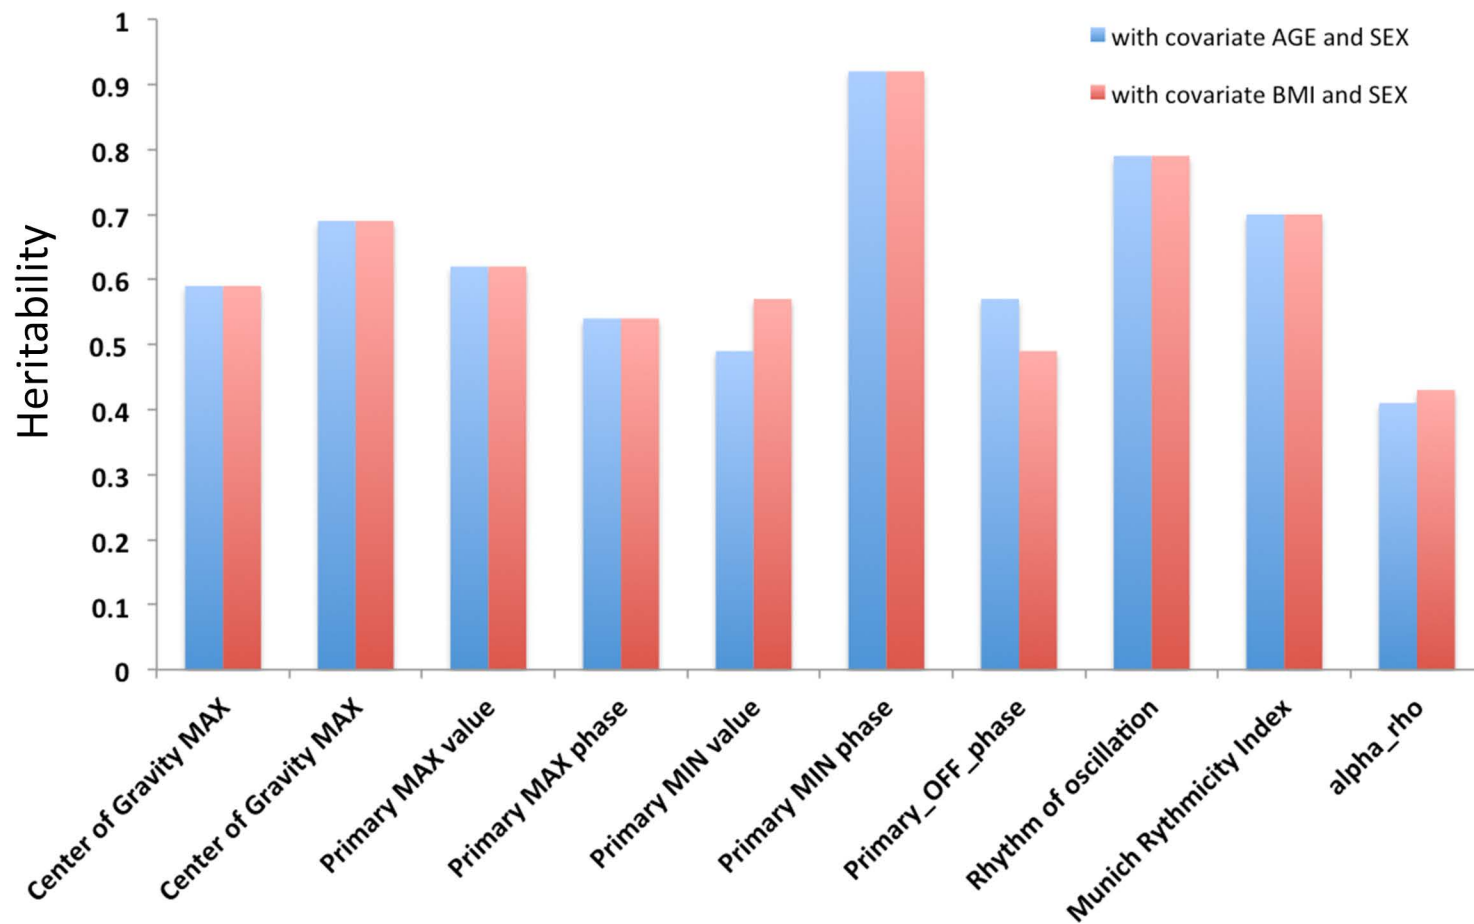

Figure S7.

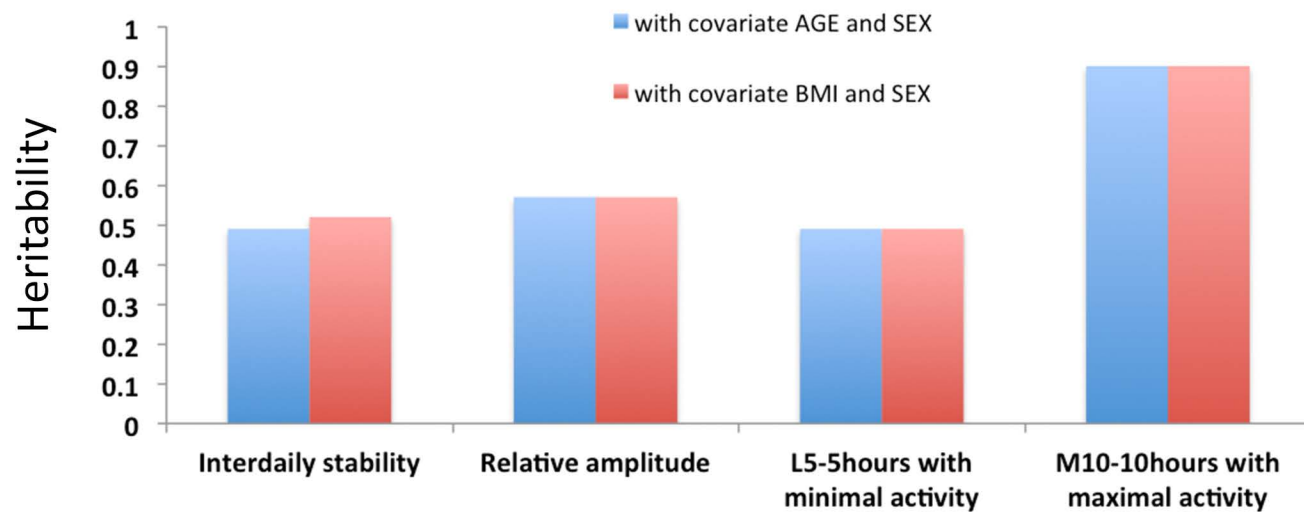

Figure S8.

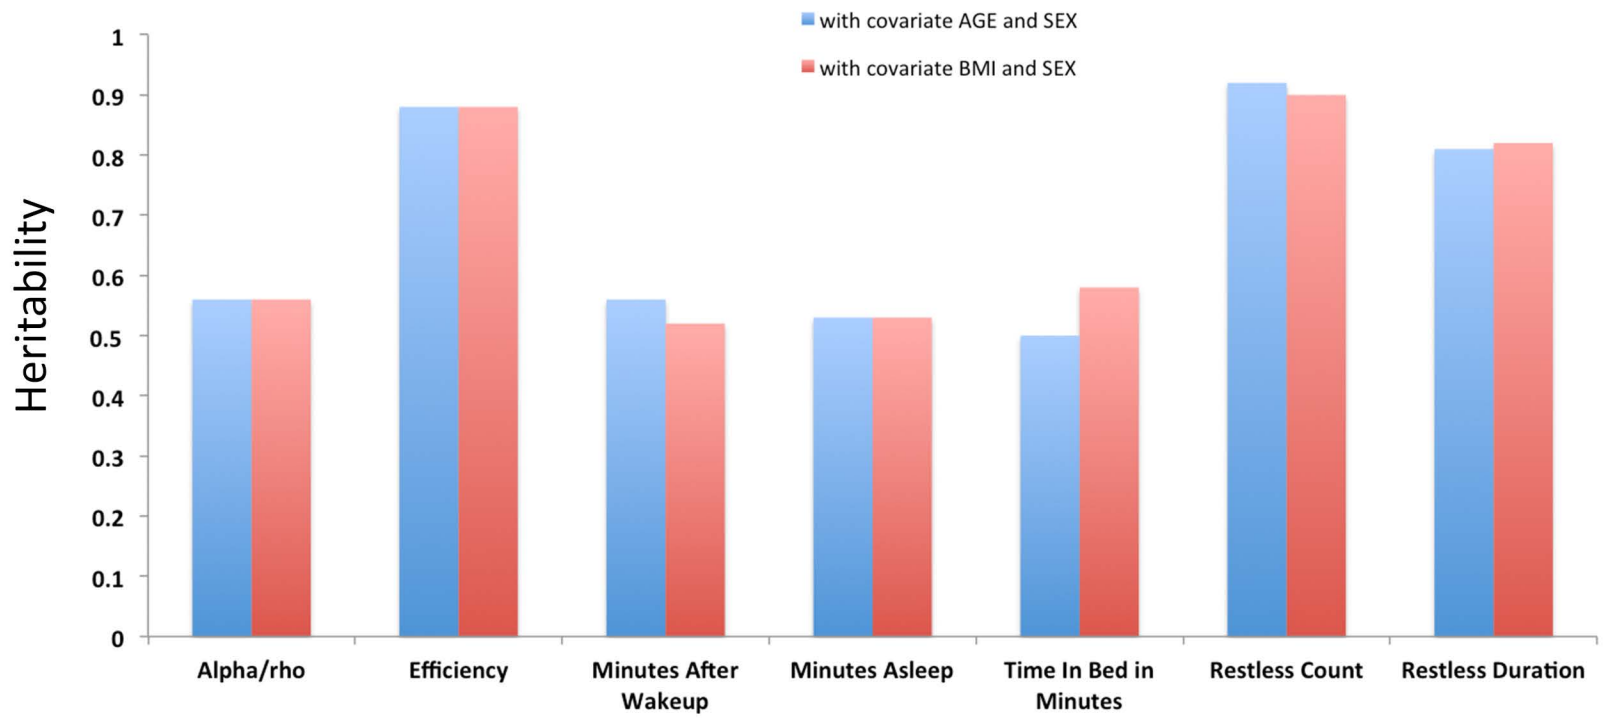

Figure S9.

Table S1: Heritability estimates and associated statistics from SOLAR

| <b>Pennzzz_Trait</b>                              | <b>Heritability with covariate AGE and SEX</b> | <b>P value</b> | <b>Heritability with covariate BMI and SEX</b> | <b>p value</b> |
|---------------------------------------------------|------------------------------------------------|----------------|------------------------------------------------|----------------|
| Active wake                                       | 0.45                                           | 0.0002         | 0.44                                           | 0.0002         |
| Light sleep                                       | 0.39                                           | 0.001          | 0.39                                           | 0.001          |
| Deep sleep                                        | 0.22                                           | 0.06           | 0.21                                           | 0.06           |
| Total Sleep                                       | 0.47                                           | 0.06           | 0.46                                           | 0.06           |
| No of Sleep Episodes                              | 0.67                                           | 0.0001         | 0.66                                           | 0.0001         |
| Mean duration of sleep episodes                   | 0.46                                           | 4.00E-05       | 0.46                                           | 4.00E-05       |
| No of wake episodes                               | 0.65                                           | 1.00E-03       | 0.65                                           | 1.00E-03       |
| Mean duration of wake episodes                    | 0.47                                           | 7.00E-05       | 0.47                                           | 7.00E-05       |
| Mean activity during wake                         | 0.71                                           | 0.0008         | 0.69                                           | 0.0008         |
| Variance of activity during wake                  | 0.78                                           | 2.40E-08       | 0.78                                           | 2.40E-08       |
| Number of sleep episodes during deep sleep        | 0.65                                           | 8.81E-10       | 0.64                                           | 8.81E-10       |
| Mean duration of sleep episodes during deep sleep | 0.65                                           | 5.00E-05       | 0.64                                           | 5.00E-05       |
| Number of wake episodes during deep sleep         | 0.66                                           | 7.00E-06       | 0.65                                           | 7.00E-06       |
| Mean duration of wake episodes during deep sleep  | 0.37                                           | 4.00E-05       | 0.35                                           | 4.00E-05       |
| Wake after sleep onset                            | 0.32                                           | 1.00E-02       | 0.32                                           | 1.00E-02       |
| Total time in homothermic state during wake       | 0.65                                           | 0.0005         | 0.68                                           | 0.0005         |
| Sleep efficiency                                  | 0.59                                           | 3.00E-03       | 0.59                                           | 3.00E-03       |
| <b>ChronoSapiens_Traits</b>                       | <b>Heritability with covariate AGE and SEX</b> | <b>P value</b> | <b>Heritability with covariate BMI and SEX</b> | <b>p value</b> |
| Center of Gravity MAX value                       | 0.59                                           | 0.0000024      | 0.59                                           | 0.0000024      |
| Center of Gravity MAX phase                       | 0.69                                           | 0.0000002      | 0.69                                           | 0.0000002      |
| Primary MAX value                                 | 0.62                                           | 0.0000001      | 0.62                                           | 0.0000001      |
| Primary MAX phase                                 | 0.54                                           | 0.000006       | 0.54                                           | 0.000006       |
| Primary MIN value                                 | 0.49                                           | 0.000005       | 0.57                                           | 0.000005       |
| Primary MIN phase                                 | 0.92                                           | 0.000006       | 0.92                                           | 0.000006       |
| Primary_OFF_phase                                 | 0.57                                           | 0.000003       | 0.49                                           | 0.000003       |
| Rhythm of oscillation                             | 0.79                                           | 4.80E-12       | 0.79                                           | 4.80E-12       |
| Munich Rythmicity Index                           | 0.7                                            | 2.32E-08       | 0.7                                            | 2.32E-08       |
| alpha_rho                                         | 0.41                                           | 0.001          | 0.43                                           | 0.001          |
| <b>Traits</b>                                     | <b>Heritability with covariate AGE and SEX</b> | <b>P value</b> | <b>Heritability with covariate BMI and SEX</b> | <b>p value</b> |
| Interdaily stability                              | 0.49                                           | 0.002          | 0.52                                           | 0.001          |
| Relative amplitude                                | 0.57                                           | 0.00005        | 0.57                                           | 0.00005        |
| L5-5hours with minimal activity                   | 0.49                                           | 0.003          | 0.49                                           | 0.003          |
| M10-10hours with                                  | 0.9                                            | 8.48E-15       | 0.9                                            | 8.48E-12       |

| maximal activity       |                                                |                |                                                |                |
|------------------------|------------------------------------------------|----------------|------------------------------------------------|----------------|
| <b>Fitbit</b>          | <b>Heritability with covariate AGE and SEX</b> | <b>P value</b> | <b>Heritability with covariate BMI and SEX</b> | <b>p value</b> |
| Alpha/rho              | 0.56                                           | 0.02           | 0.56                                           | 0.01           |
| Efficiency             | 0.88                                           | 0.00002        | 0.88                                           | 0.00002        |
| Minutes After Wakeup   | 0.56                                           | 0.003          | 0.52                                           | 0.01           |
| Minutes Asleep         | 0.53                                           | 0.005          | 0.53                                           | 0.005          |
| Time In Bed in Minutes | 0.5                                            | 0.01           | 0.58                                           | 0.01           |
| Restless Count         | 0.92                                           | 0.000005       | 0.9                                            | 0.00005        |
