# Supplementary material
Source: PubMed Central journal article supplement (PMC7199794)
Supplement: NIHMS1583723-supplement-Supplement_table.pdf [file NIHMS1583723-supplement-Supplement_table.pdf]

Table S1: Heritability estimates and associated statistics from SOLAR

| <b>Pennzzz_Trait</b>                              | <b>Heritability with covariate AGE and SEX</b> | <b>P value</b> | <b>Heritability with covariate BMI and SEX</b> | <b>p value</b> |
|---------------------------------------------------|------------------------------------------------|----------------|------------------------------------------------|----------------|
| Active wake                                       | 0.45                                           | 0.0002         | 0.44                                           | 0.0002         |
| Light sleep                                       | 0.39                                           | 0.001          | 0.39                                           | 0.001          |
| Deep sleep                                        | 0.22                                           | 0.06           | 0.21                                           | 0.06           |
| Total Sleep                                       | 0.47                                           | 0.06           | 0.46                                           | 0.06           |
| No of Sleep Episodes                              | 0.67                                           | 0.0001         | 0.66                                           | 0.0001         |
| Mean duration of sleep episodes                   | 0.46                                           | 4.00E-05       | 0.46                                           | 4.00E-05       |
| No of wake episodes                               | 0.65                                           | 1.00E-03       | 0.65                                           | 1.00E-03       |
| Mean duration of wake episodes                    | 0.47                                           | 7.00E-05       | 0.47                                           | 7.00E-05       |
| Mean activity during wake                         | 0.71                                           | 0.0008         | 0.69                                           | 0.0008         |
| Variance of activity during wake                  | 0.78                                           | 2.40E-08       | 0.78                                           | 2.40E-08       |
| Number of sleep episodes during deep sleep        | 0.65                                           | 8.81E-10       | 0.64                                           | 8.81E-10       |
| Mean duration of sleep episodes during deep sleep | 0.65                                           | 5.00E-05       | 0.64                                           | 5.00E-05       |
| Number of wake episodes during deep sleep         | 0.66                                           | 7.00E-06       | 0.65                                           | 7.00E-06       |
| Mean duration of wake episodes during deep sleep  | 0.37                                           | 4.00E-05       | 0.35                                           | 4.00E-05       |
| Wake after sleep onset                            | 0.32                                           | 1.00E-02       | 0.32                                           | 1.00E-02       |
| Total time in homothermic state during wake       | 0.65                                           | 0.0005         | 0.68                                           | 0.0005         |
| Sleep efficiency                                  | 0.59                                           | 3.00E-03       | 0.59                                           | 3.00E-03       |
| <b>ChronoSapiens_Traits</b>                       | <b>Heritability with covariate AGE and SEX</b> | <b>P value</b> | <b>Heritability with covariate BMI and SEX</b> | <b>p value</b> |
| Center of Gravity MAX value                       | 0.59                                           | 0.0000024      | 0.59                                           | 0.0000024      |
| Center of Gravity MAX phase                       | 0.69                                           | 0.0000002      | 0.69                                           | 0.0000002      |
| Primary MAX value                                 | 0.62                                           | 0.0000001      | 0.62                                           | 0.0000001      |
| Primary MAX phase                                 | 0.54                                           | 0.000006       | 0.54                                           | 0.000006       |
| Primary MIN value                                 | 0.49                                           | 0.000005       | 0.57                                           | 0.000005       |
| Primary MIN phase                                 | 0.92                                           | 0.000006       | 0.92                                           | 0.000006       |
| Primary_OFF_phase                                 | 0.57                                           | 0.000003       | 0.49                                           | 0.000003       |
| Rhythm of oscillation                             | 0.79                                           | 4.80E-12       | 0.79                                           | 4.80E-12       |
| Munich Rythmicity Index                           | 0.7                                            | 2.32E-08       | 0.7                                            | 2.32E-08       |
| alpha_rho                                         | 0.41                                           | 0.001          | 0.43                                           | 0.001          |
| <b>Traits</b>                                     | <b>Heritability with covariate AGE and SEX</b> | <b>P value</b> | <b>Heritability with covariate BMI and SEX</b> | <b>p value</b> |
| Interdaily stability                              | 0.49                                           | 0.002          | 0.52                                           | 0.001          |
| Relative amplitude                                | 0.57                                           | 0.00005        | 0.57                                           | 0.0005         |
| L5-5hours with minimal activity                   | 0.49                                           | 0.003          | 0.49                                           | 0.003          |
| M10-10hours with                                  | 0.9                                            | 8.48E-15       | 0.9                                            | 8.48E-12       |

|                        |                                                |                |                                                |                |
|------------------------|------------------------------------------------|----------------|------------------------------------------------|----------------|
| maximal activity       |                                                |                |                                                |                |
| <b>Fitbit</b>          | <b>Heritability with covariate AGE and SEX</b> | <b>P value</b> | <b>Heritability with covariate BMI and SEX</b> | <b>p value</b> |
| Alpha/rho              | 0.56                                           | 0.02           | 0.56                                           | 0.01           |
| Efficiency             | 0.88                                           | 0.00002        | 0.88                                           | 0.00002        |
| Minutes After Wakeup   | 0.56                                           | 0.003          | 0.52                                           | 0.01           |
| Minutes Asleep         | 0.53                                           | 0.005          | 0.53                                           | 0.005          |
| Time In Bed in Minutes | 0.5                                            | 0.01           | 0.58                                           | 0.01           |
| Restless Count         | 0.92                                           | 0.000005       | 0.9                                            | 0.00005        |
